# Supplementary material
Source: Copernicus journal article supplement (doi:10.5194/egusphere-2026-2516)
Supplement: Supplementary file 1 [file egusphere-2026-2516-supplement.pdf]

---

## Supplementary material to:

What surface radiative fluxes reveal about Arctic cloud modelling accuracy

Yaël Le Gars<sup>1</sup>, Jean-Christophe Raut<sup>1</sup>, Louis Marelle<sup>1</sup>

<sup>1</sup>LATMOS/IPSL, Sorbonne Université, UVSQ, CNRS, Paris, France

---

This document provides additional figures and tables supporting the main manuscript.

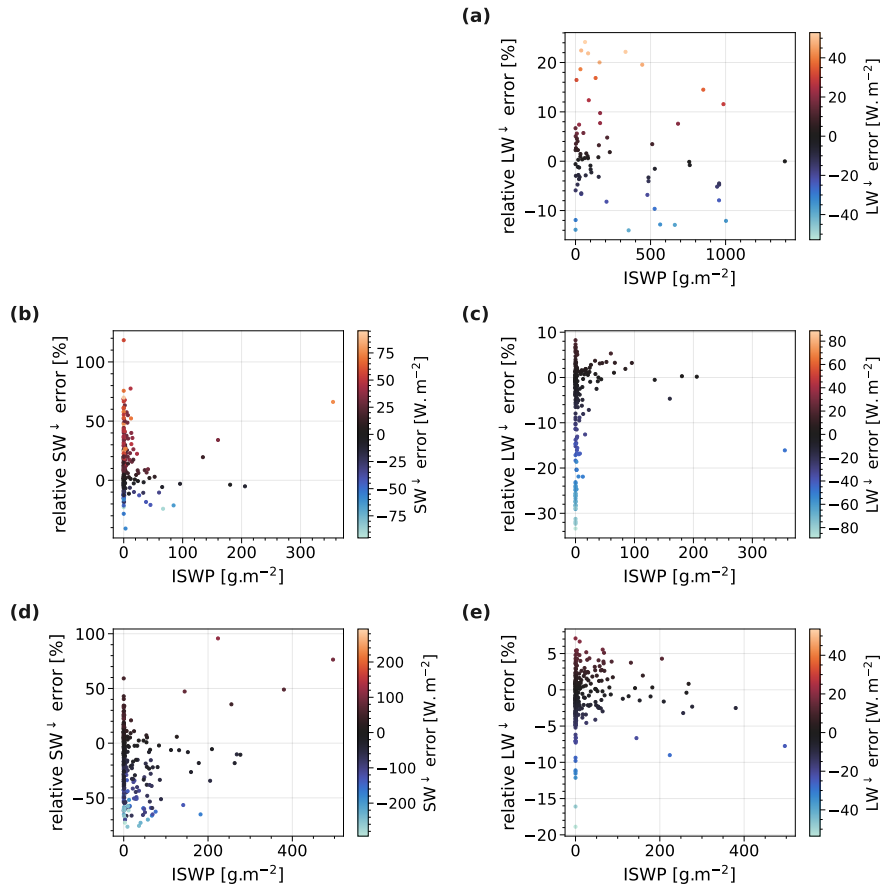

Figure S1: Radiative fluxes biases as a function of modelled ice and snow water path (ISWP), showing relative error (model minus observation) on y-axis and colour-coded by the raw error. (a) LW<sup>↓</sup> errors during P1, (b) SW<sup>↓</sup> errors during P2, (c) LW<sup>↓</sup> errors during P2, (d) SW<sup>↓</sup> errors during P3 and (e) LW<sup>↓</sup> biases during P3.

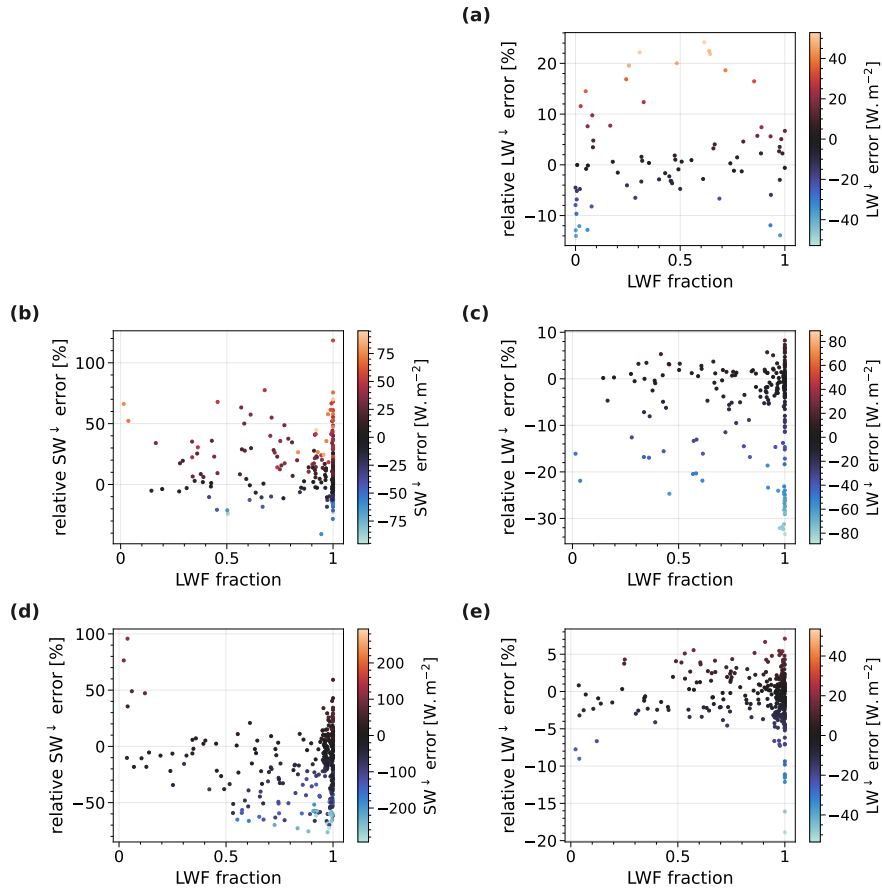

Figure S2: Radiative fluxes biases as a function of modelled liquid water fraction (LWF), showing relative error (model minus observation) on y-axis and colour-coded by the raw error. (a)  $LW^\downarrow$  errors during P1, (b)  $SW^\downarrow$  errors during P2, (c)  $LW^\downarrow$  errors during P2, (d)  $SW^\downarrow$  errors during P3 and (e)  $LW^\downarrow$  biases during P3.

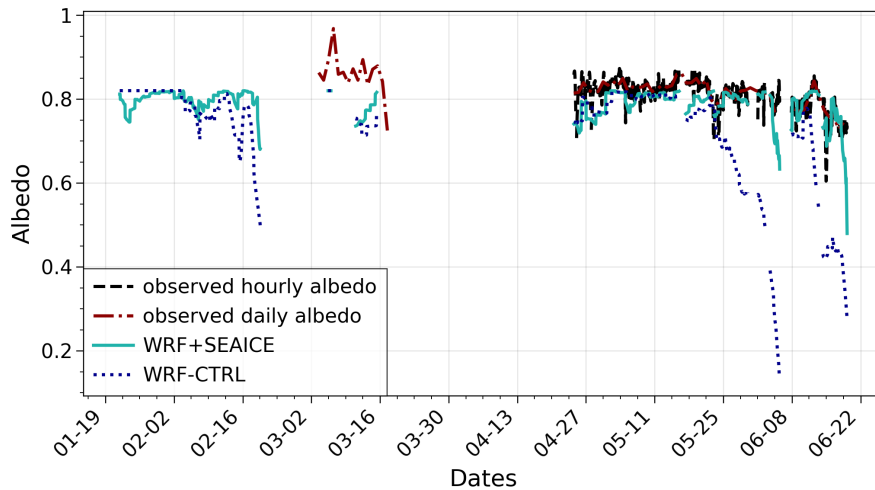

Figure S3: Temporal serie of observed (daily and hourly) and modelled (WRF-CTRL and WRF-SEAICE) hourly surface Albedo. Observed daily albedo is provide by N-ICE measurements at noon. Observed hourly albedo is calculated as the ratio of hourly measured  $SW^\uparrow/SW$  for comparison.

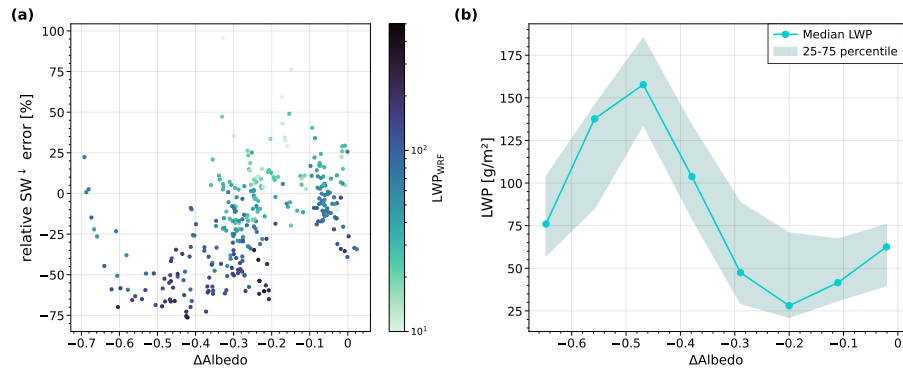

Figure S4: **(a)** P3 SW<sup>↓</sup> errors distribution as a function of surface albedo biases with LWP<sub>WRF</sub> colored during. **(b)** binned LWP values distribution with respect to surface albedo biases.

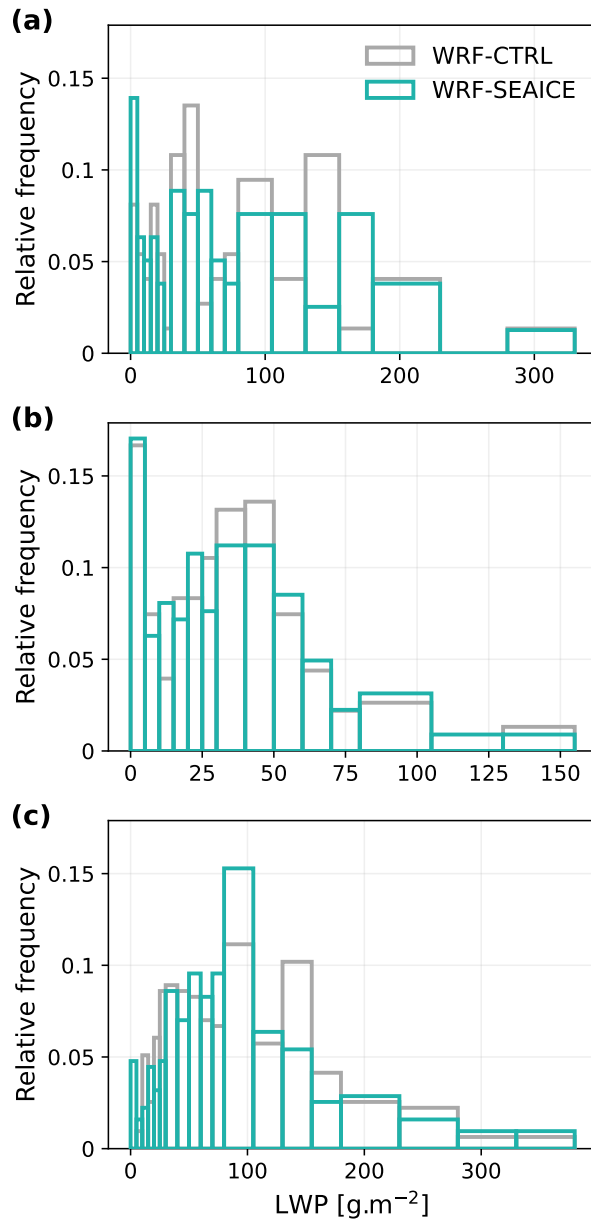

Figure S5: Adaptive binned distribution of LWP values, comparing WRF-CTRL and WRF-SEAICE for a) P1, b) P2 and c) P3. Bin size of  $5 \text{ g}\cdot\text{m}^{-2}$  when  $\text{LWP} \leq 30 \text{ g}\cdot\text{m}^{-2}$ ,  $10$  when  $\text{LWP} \leq 80 \text{ g}\cdot\text{m}^{-2}$  and  $25$  otherwise.

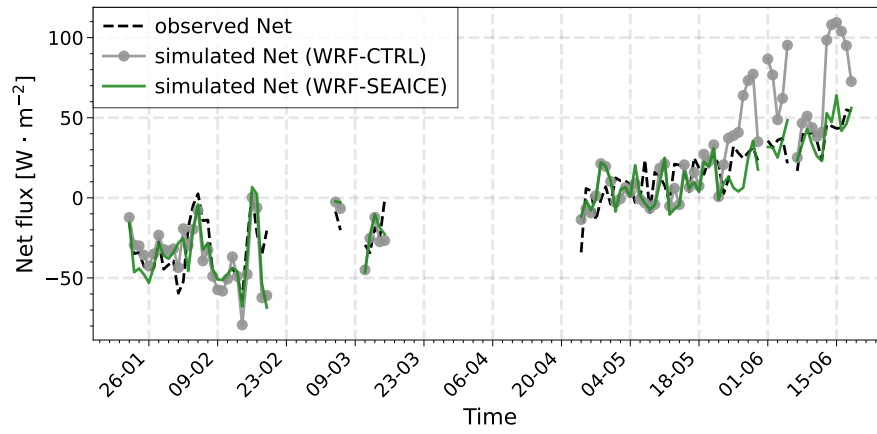

Figure S6: Time series of observed (dashed black) and simulated net radiation from WRF-CTRL (dotted gray) and WRF-SEAICE (solid green) along the N-ICE drift.

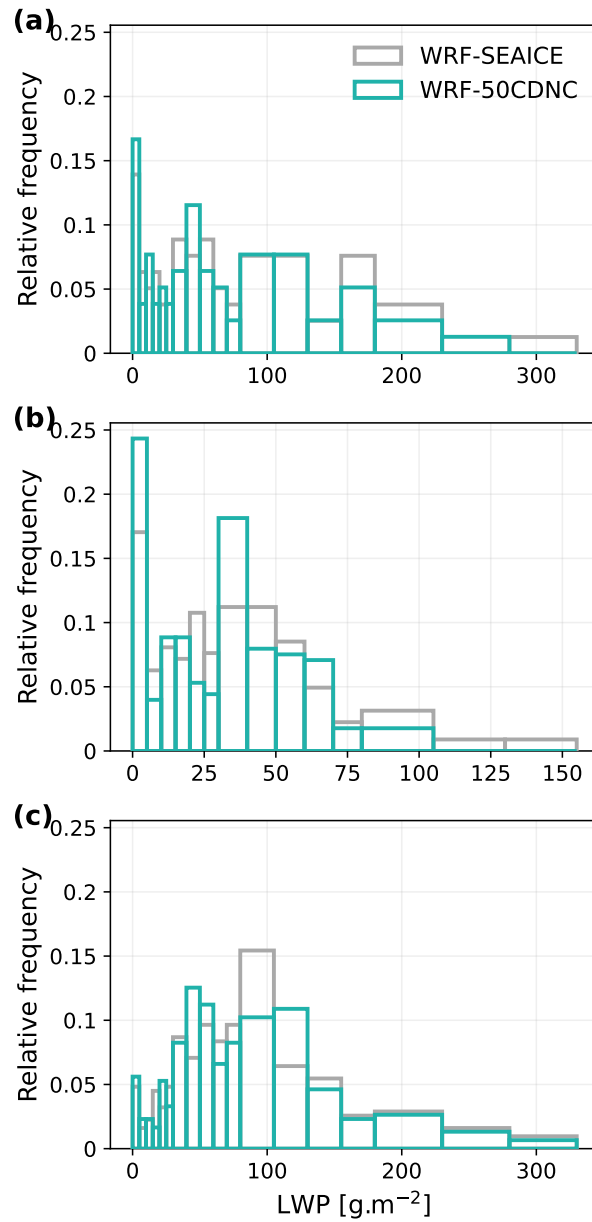

Figure S7: Adaptive binned distribution of LWP values, comparing WRF-SEAICE (100 CDNC) and WRF-50CDNC for a) P1, b) P2 and c) P3. Bin size of  $5 \text{ g.m}^{-2}$  when  $\text{LWP} \leq 30 \text{ g.m}^{-2}$ ,  $10 \text{ g.m}^{-2}$  when  $\text{LWP} \leq 80 \text{ g.m}^{-2}$  and  $25$  otherwise.

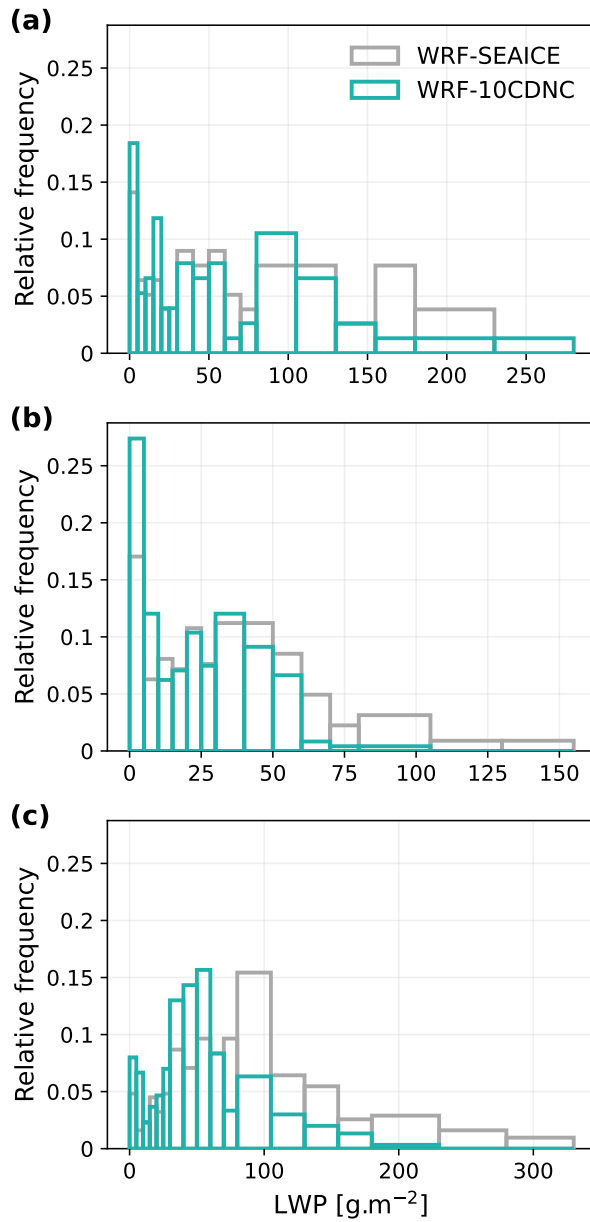

Figure S8: Adaptive binned distribution of LWP values, comparing WRF-SEAICE (100 CDNC) and WRF-10CDNC for a) P1, b) P2 and c) P3. Bin size of 5  $\text{g}\cdot\text{m}^{-2}$  when  $\text{LWP} \leq 30 \text{ g}\cdot\text{m}^{-2}$ , 10 when  $\text{LWP} \leq 80 \text{ g}\cdot\text{m}^{-2}$  and 25 otherwise.
